# Supplementary material for: Fabrication of innovative multifunctional dye using MXene nanosheets
Source: Royal Society of Chemistry journal article supplement (doi:10.1039/d4nh00187g), 2024-01-01
Supplement: d4nh00187g1.pdf [file d4nh00187g1.pdf]

## Supporting Information

### **Title: Fabrication of innovative multifunctional dye using MXene nanosheets**

*Hyeongtaek Park<sup>a</sup>, Young Ho Park<sup>a,b,c</sup>, Sujin Kim<sup>a</sup>, G. Mural<sup>a,c</sup>, Nathaniel S. Hwang<sup>d,e,f</sup> and Hwan D. Kim<sup>a,b,g\*</sup>*

<sup>a</sup>Department of IT Convergence (BK21 FOUR), Korea National University of Transportation, Chungju, 27469, Republic of Korea

<sup>b</sup>Department of Polymer Science and Engineering, Korea National University of Transportation, Chungju, 27469, Republic of Korea

<sup>c</sup>Chemical Industry Institute, Korea National University of Transportation, Chungju 27469, South Korea

<sup>d</sup>School of Chemical and Biological Engineering, Institute of Chemical Process, Seoul National University, Seoul, 08826, Republic of Korea

<sup>e</sup>BioMax/N-Bio Institute, Seoul National University, Seoul, 08826, Republic of Korea

<sup>f</sup>Institute of Engineering Research, Seoul National University, Seoul, 08826, Republic of Korea

<sup>g</sup>Department of Biomedical Engineering, Korea National University of Transportation, Chungju, 27469, Republic of Korea

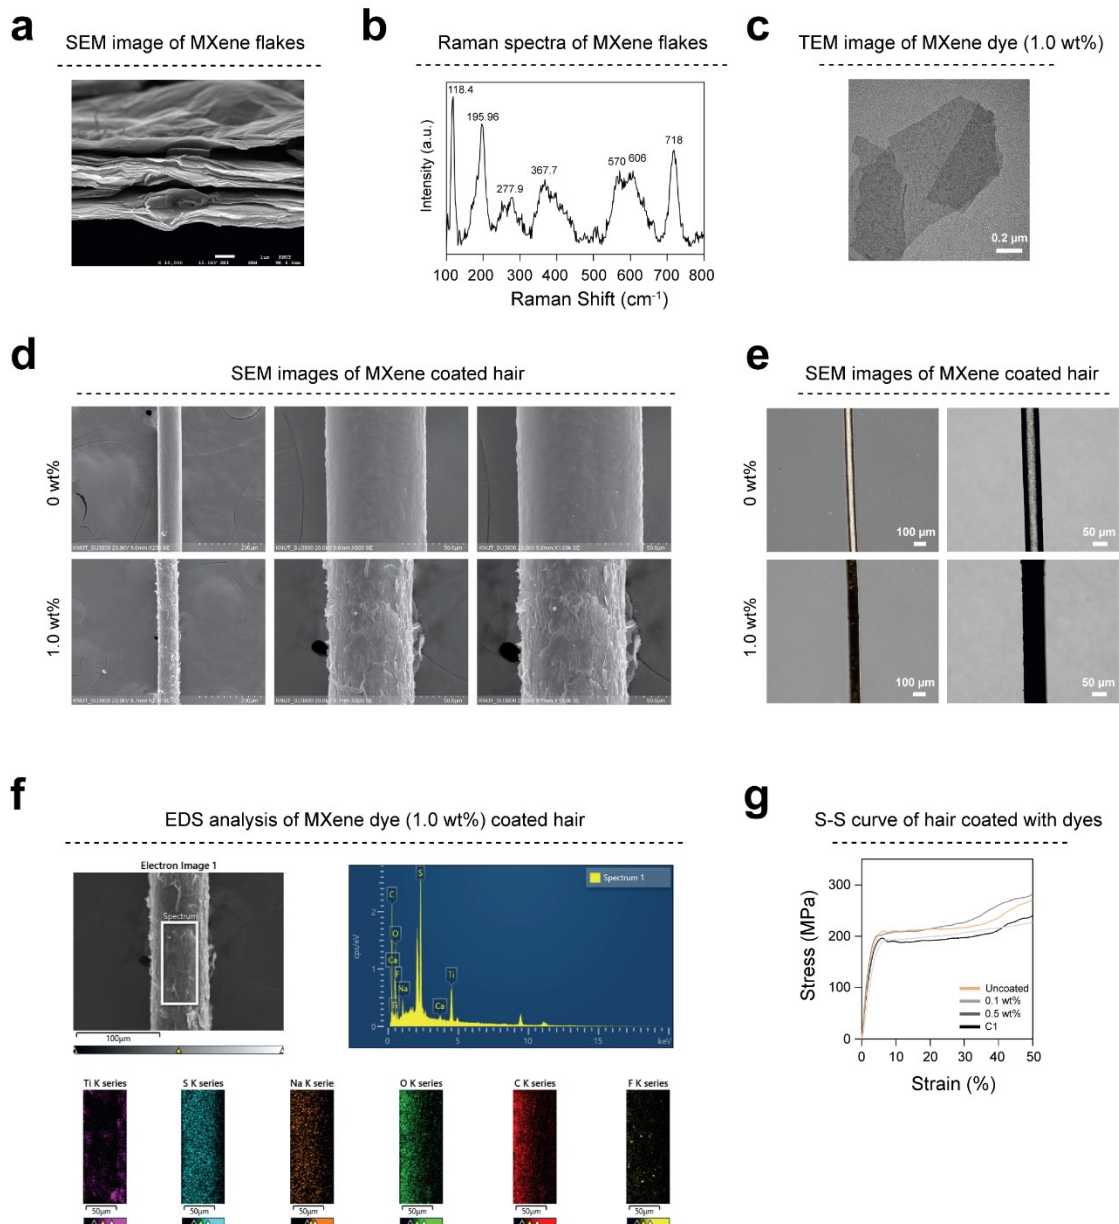

**Fig. S1** Characterization of MXene flakes and MXene dye.

(a) SEM image of MXene flakes. (b) Raman spectra of  $\text{Ti}_3\text{C}_2$  MXene flakes. (c) TEM image of MXene dye (1.0 wt%). (d, e) SEM and microscope images of uncoated hair (0 wt%) (top) and MXene dye coated hair (1.0 wt%) (bottom). (f) EDS mapping images of MXene dye coated hair. (g) Stress-strain curves of MXene dyes at various concentrations and commercial hair dyes.

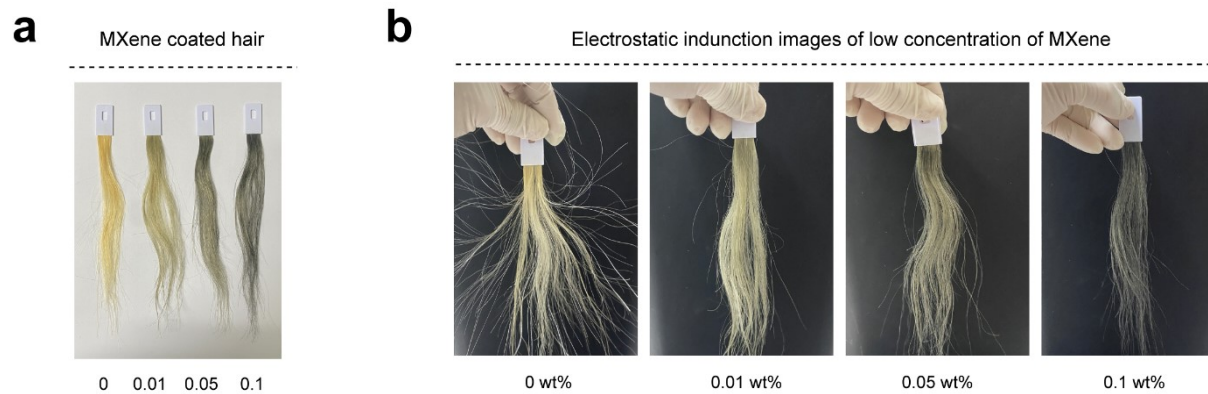

**Fig. S2** Gross image and electrostatic properties of hair coated with various concentrations of MXene dye.

(a) Gross images of hair coated with different concentrations (0 wt%, 0.01 wt%, 0.05 wt%, 0.1 wt%) of MXene dye. (b) Antistatic properties of hair coated with MXene dye at various concentrations.

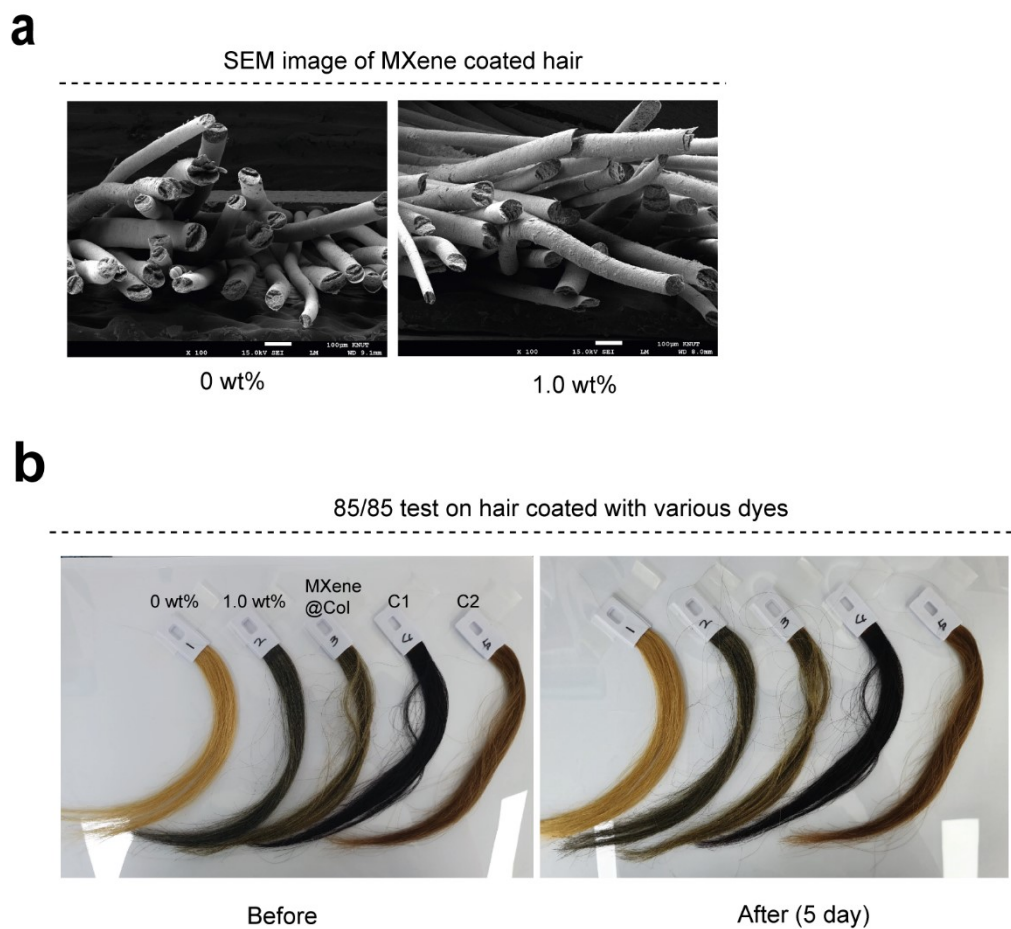

**Fig. S3** Durability properties of hair coated with various dyes.

(a) Cross-sectional SEM images of uncoated hair (0 wt%) (top) and hair coated with MXene dye (1.0 wt%) (bottom). (b) 85/85 test (Temperature 85 °C, relative humidity 85 %) of hair coated with various dyes Before and After (Day 5) images.

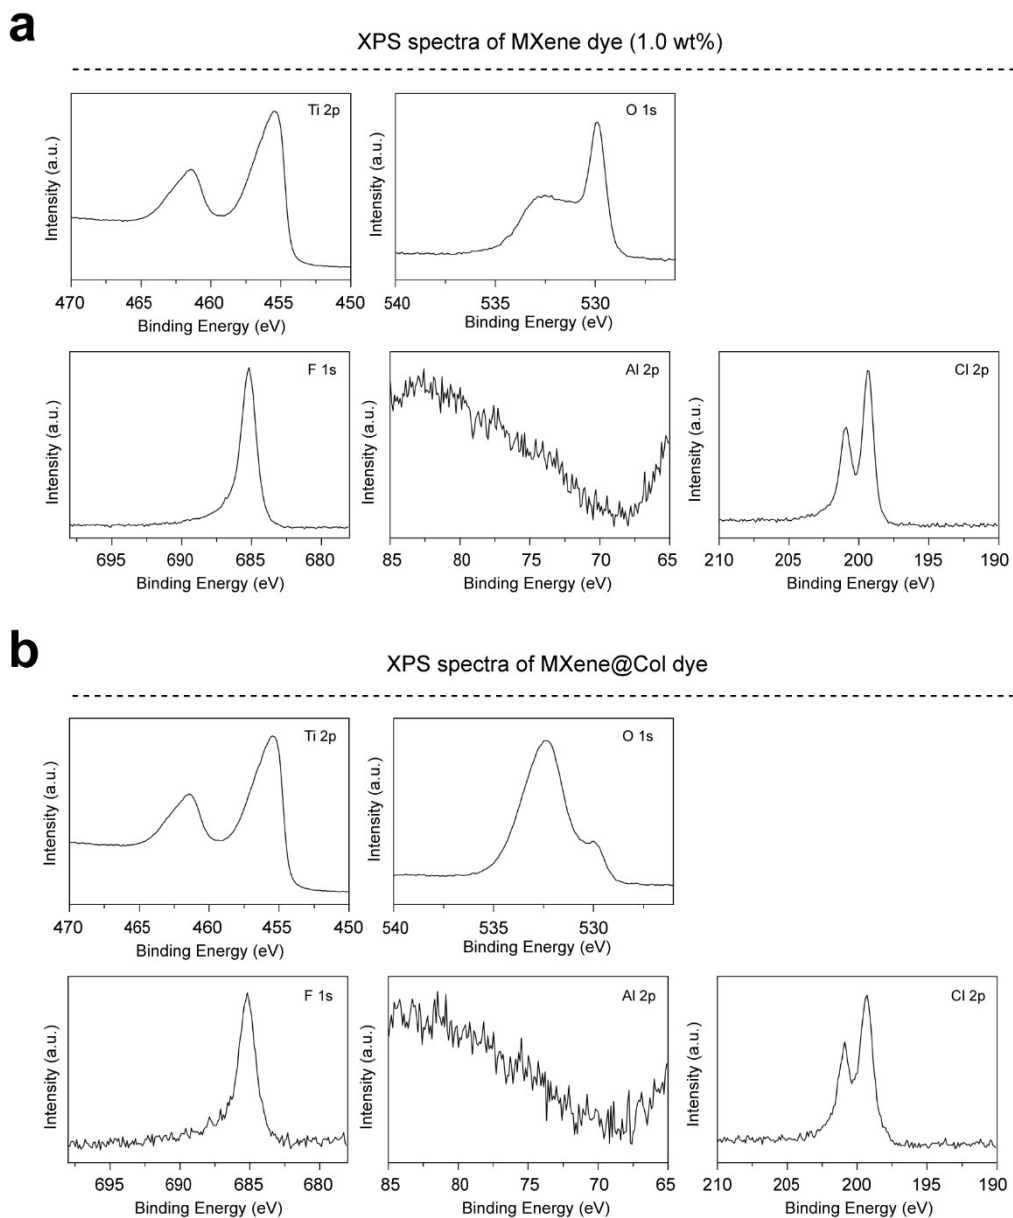

**Fig. S4.** XPS spectrum of MXene dye and MXene@Col dye

(a, b) XPS corresponding spectra of Ti 2p, O 1s, F 1s, Al 2p, Cl 2p for MXene dye and MXene@Col dye.

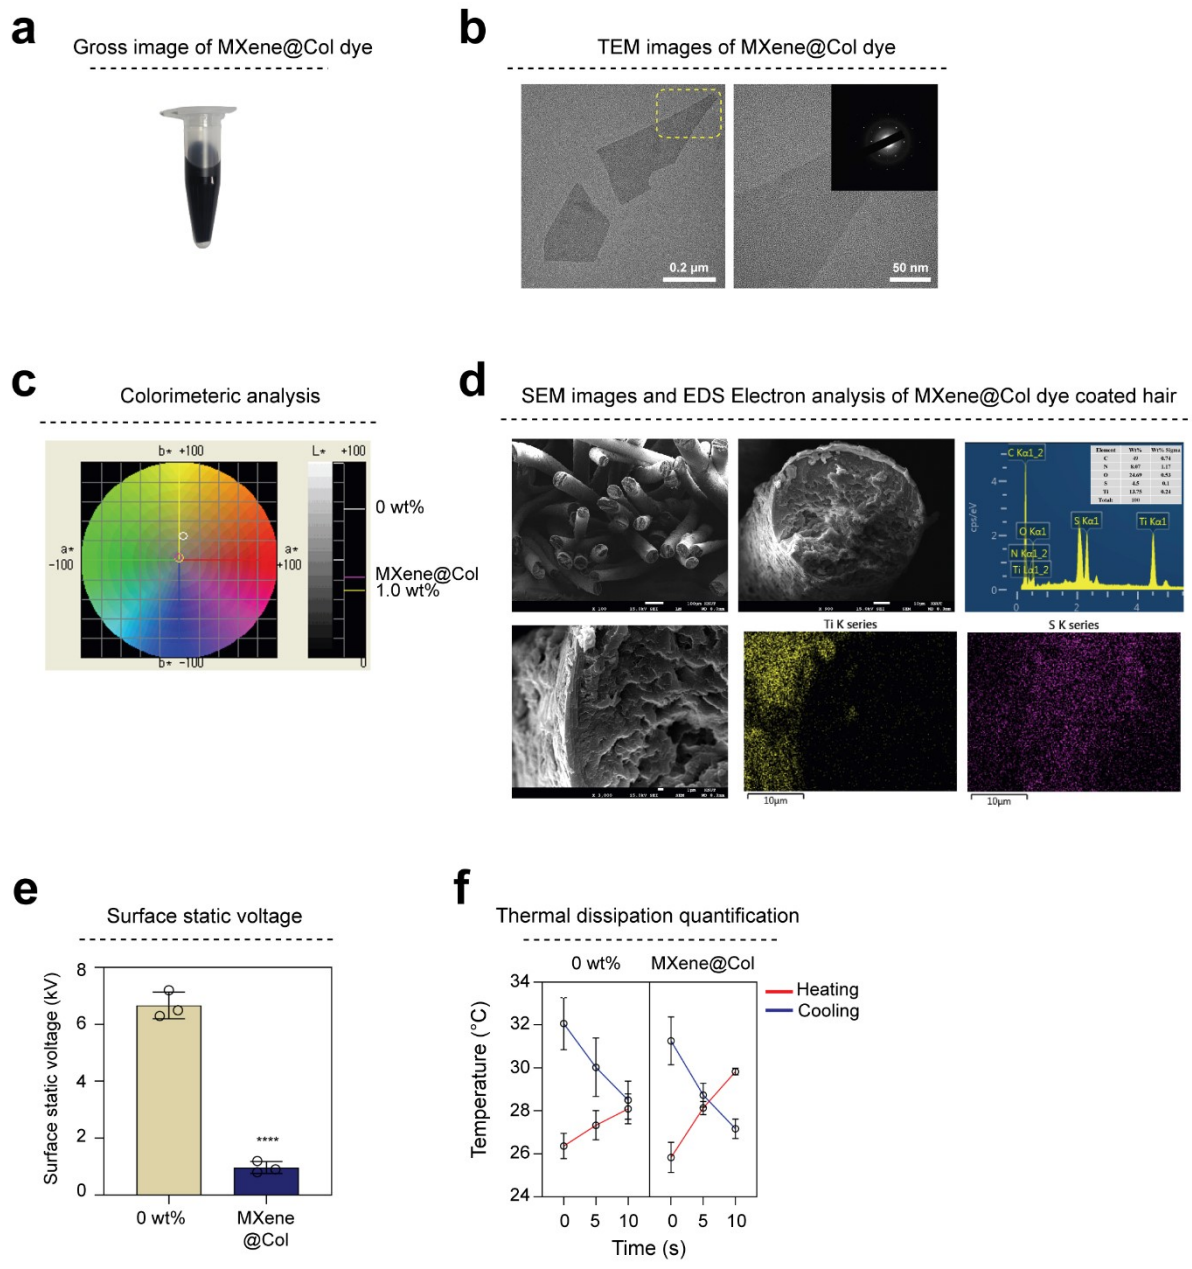

**Fig. S5.** Characterization of MXene dye surface modified with collagen

(a) Gross image of MXene@Col dye. (b) TEM and SAED images of MXene@Col dye. (c) Colorimeter analysis images of uncoated hair (0 wt%), hair coated with MXene dye (1.0 wt%), and hair coated with MXene@Col dye. (d) SEM and EDS mapping analysis image of hair coated with MXene@Col dye. (e) Surface static voltage of MXene@Col coated hair. (f) Thermal dissipation quantification of MXene@Col coated hair. \*\*\*\* $p < 0.0001$  The symbol \* indicates comparisons with 0 wt%.

**Table S1.** Electromagnetic interface (EMI) shielding efficiency data of various hiar dye

|                   |                 | 0 wt% | 1.0 wt% | MXene@Col | C1    | C2    |
|-------------------|-----------------|-------|---------|-----------|-------|-------|
| EMI<br>SE<br>(dB) | 1 <sup>st</sup> | 1.511 | 6.193   | 1.81      | 1.293 | 1.843 |
|                   | 2 <sup>nd</sup> | 1.512 | 6.132   | 1.858     | 1.339 | 1.743 |
|                   | 3 <sup>rd</sup> | 1.518 | 6.12    | 1.776     | 1.31  | 1.728 |
|                   | Ave.            | 1.51  | 6.14    | 1.81      | 1.314 | 1.78  |

**Table S2.** Hair samples coated with or without MXene dye (1.0 wt%) and MXene@Col dye and zeta potential data table for each dye

|                     |                 | 0 wt%  | 1.0 wt% | MXene@Col | MXene solution | MXene@Col solution |
|---------------------|-----------------|--------|---------|-----------|----------------|--------------------|
| Zeta potential (mV) | 1 <sup>st</sup> | -16.44 | -21.74  | -9.29     | -44.54         | 27.09              |
|                     | 2 <sup>nd</sup> | -17.16 | -22.19  | -6.33     | -41.10         | 28.83              |
|                     | Ave.            | -16.8  | -21.97  | -7.81     | -42.82         | 27.96              |



**Table S3.** Colorimeter data table of uncoated hair (0 wt%), hair coated with MXene dye (1.0 wt%), and hair coated with MXene@Col dye.

|                             | 0 wt% | 1.0 wt% | MXene@Col |
|-----------------------------|-------|---------|-----------|
| L*<br>(100 White / 0 Black) | 76.45 | 34.61   | 41.44     |
| a*<br>(+ Red / - Green)     | 3.02  | -0.37   | -0.95     |
| b*<br>(+ Yellow / - Blue)   | 25.36 | 2.68    | 3.07      |
